# Supplementary material
Source: MDPI journal article supplement (https://www.mdpi.com/2076-3263/14/4/97)
Supplement: s1 [file s1]

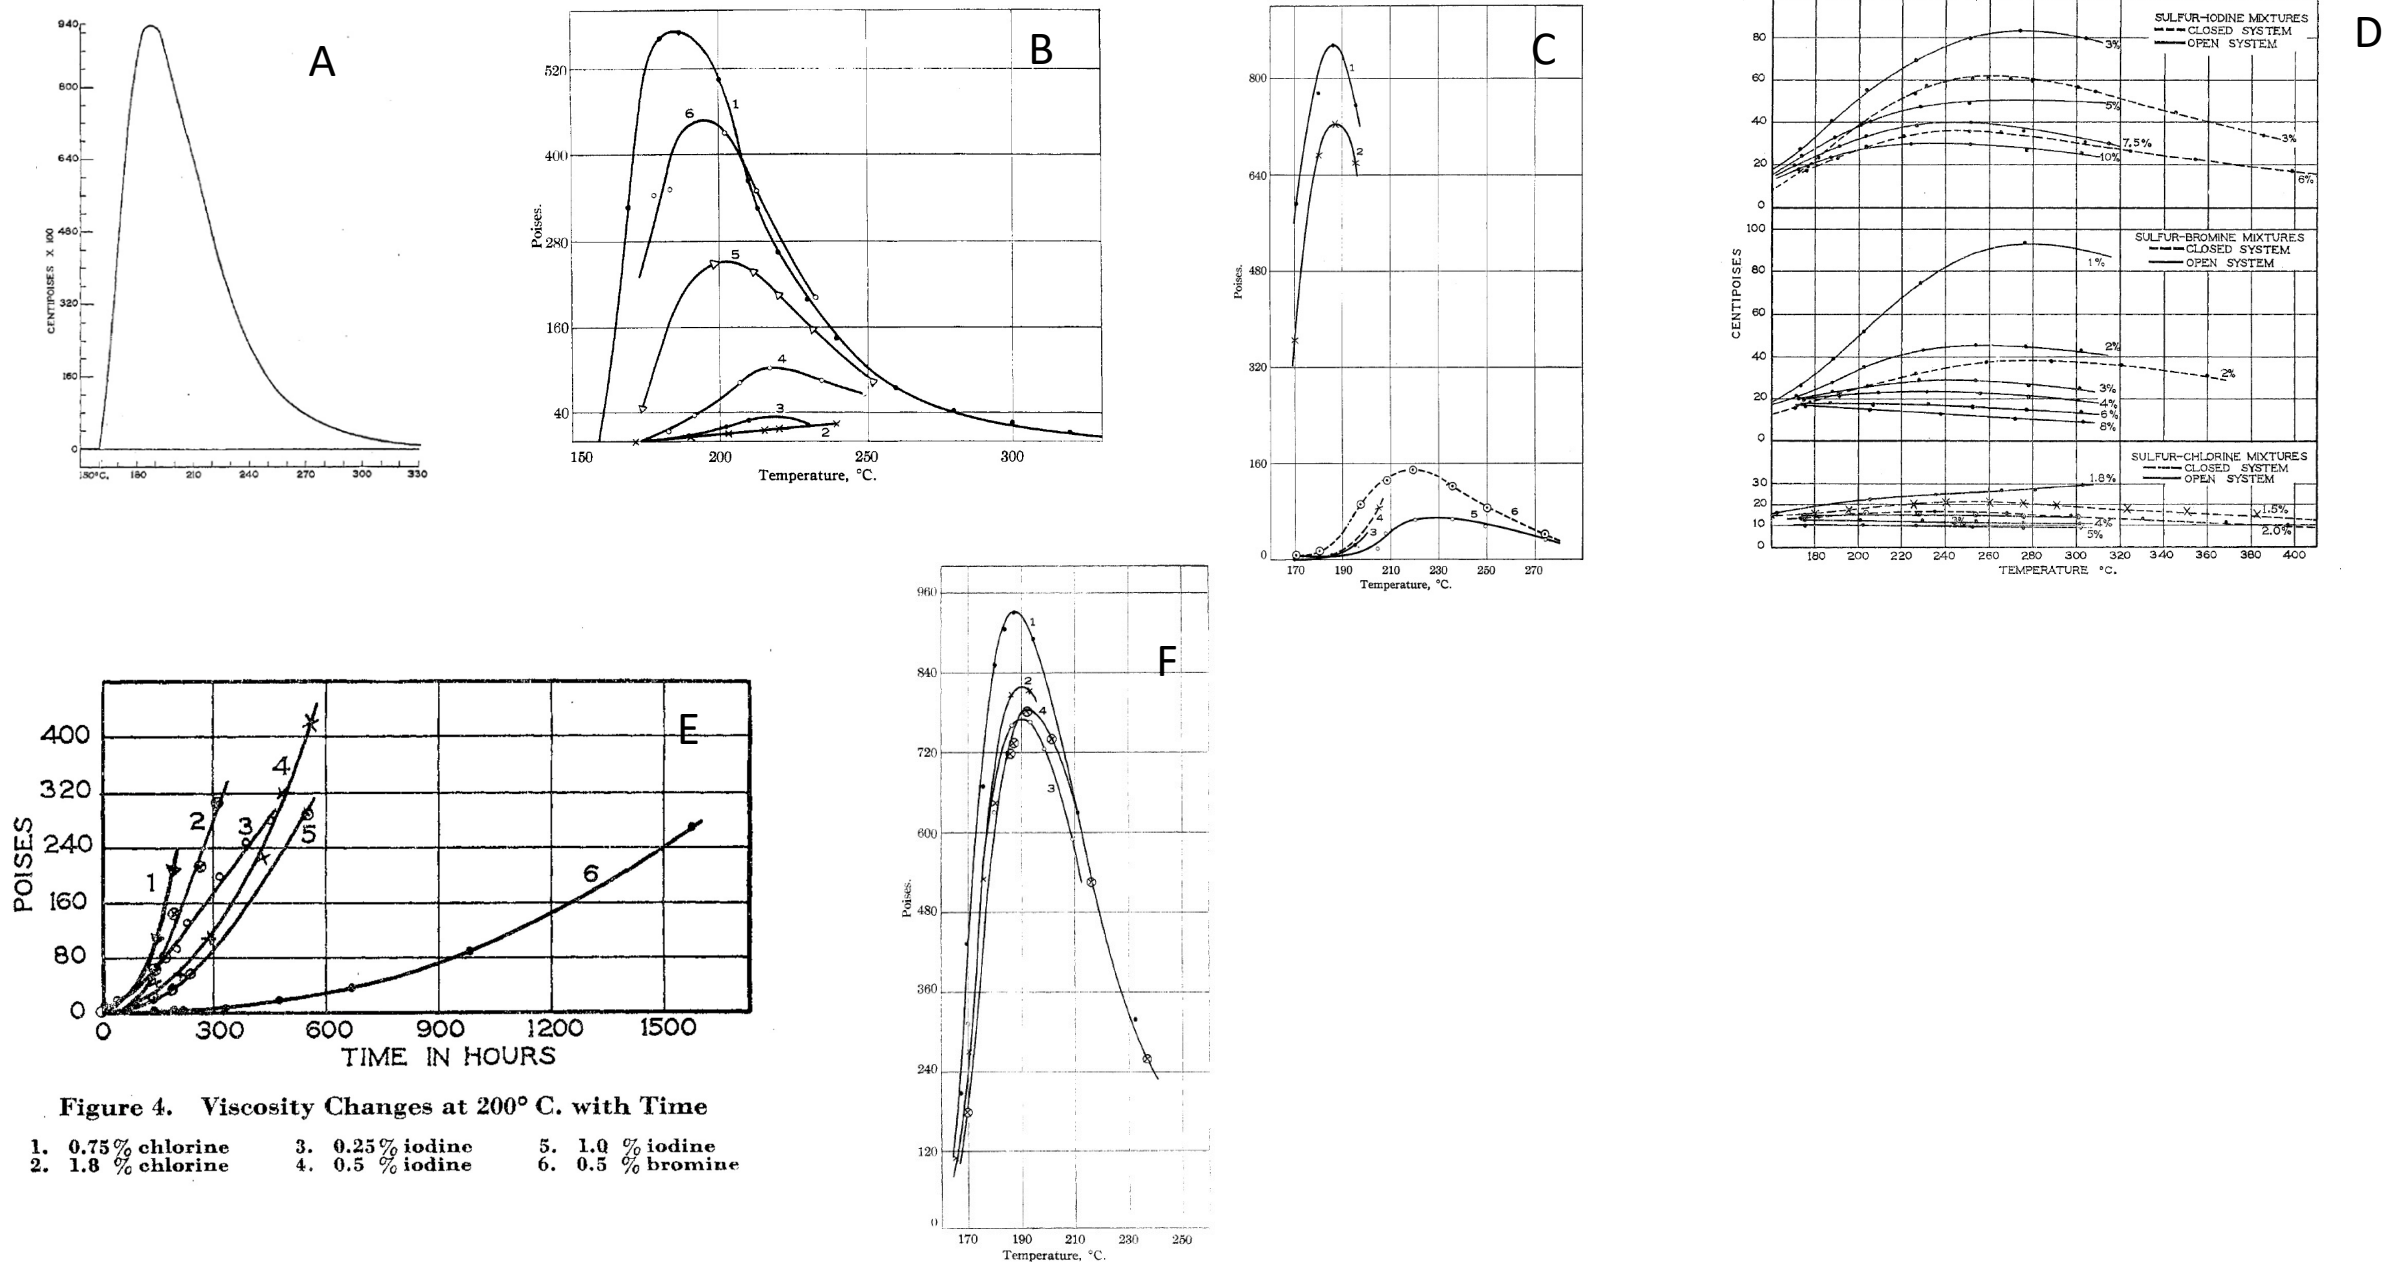

**Supplementary Figure.** Original from which Figures 3A-F, discussed in the text, were redrawn. **A) D) E)** reprinted with permission from Fanelli, R., (1946): Modifying the viscosity of Sulfur Industrial and Engineering Chemistry 1946, 38, 39-43 **B)-C)- F)** are reprinted with permission from Bacon, R.F. Fanelli R. (1943) The viscosity of Sulfur J.Am. Chem. Soc. 65, 639-648. Copyrights (1943; 1946) American Chemical Society
