# Supplementary material
Source: MDPI journal article supplement (https://www.mdpi.com/2076-3263/14/4/97)
Supplement: s1 [file s1]

| Components reacting with S                                         | Temperature intervals (°C)                                                                                                                                             | Experimental concentration (when given)                                                                                                                                           | Products                                                                                                                                                                                                                                                                                                                                    | Interactions (experimentally determined)                                                                          | Effects on S-viscosity                                                                                                                                                                                                                                                                                                                                                                                                                                       |
|--------------------------------------------------------------------|------------------------------------------------------------------------------------------------------------------------------------------------------------------------|-----------------------------------------------------------------------------------------------------------------------------------------------------------------------------------|---------------------------------------------------------------------------------------------------------------------------------------------------------------------------------------------------------------------------------------------------------------------------------------------------------------------------------------------|-------------------------------------------------------------------------------------------------------------------|--------------------------------------------------------------------------------------------------------------------------------------------------------------------------------------------------------------------------------------------------------------------------------------------------------------------------------------------------------------------------------------------------------------------------------------------------------------|
| <p><b>Organics</b></p> <p><b>Hydrocarbons</b></p>                  | <p>a) 180-210°C</p> <p>b) 260 °C</p>                                                                                                                                   | > 0.01 wt%                                                                                                                                                                        | <p>- minute amounts of <b>H<sub>2</sub>S<sub>x</sub></b> (a);</p> <p>- evident formation of <b>H<sub>2</sub>S<sub>x</sub></b> (b);</p> <p>- <b>CS<sub>2</sub></b> (after few hours of boiling);</p> <p>- <b>H<sub>2</sub>S release</b> after prolonged boiling of S+ organics/hydrocarbons)</p> <p>No evident effects until T &gt;200°C</p> | dependent on the presence of H <sub>2</sub> S / H <sub>2</sub> S <sub>x</sub> dissolved in S and stabilized by S. | <p>(b) Decrease (<math>\mu</math> &lt; 4Pa·s) during a first cooling cycle (230-170 °C); this <u>behavior disappears after “several” cooling -heating cycles</u></p>                                                                                                                                                                                                                                                                                         |
| <p><b>H<sub>2</sub>S</b></p> <p><b>OPEN- CLOSED conditions</b></p> | <p><u>OPEN:</u></p> <p>a) 140 °C</p> <p>b) 125-190 °C (*1.5 hr)</p> <p>c)180-210 °C</p> <p>e) &gt;180-210 °C (long kept)</p> <p><u>CLOSED:</u></p> <p>f)&gt; 180°C</p> | <p>a) Dissolved H<sub>2</sub>S (*100 hrs)</p> <p>b) Dissolved H<sub>2</sub>S</p> <p>c) Dissolved H<sub>2</sub>S [44 minute amounts- no value given]</p> <p>d) 0.4%-1.68% [45]</p> | <p><b>H<sub>2</sub>S<sub>x</sub> formation (S+ H<sub>2</sub>S)</b></p> <p><b>d) H<sub>2</sub>S<sub>x</sub> volatilization for longer treatment &gt; T</b></p> <p>d-e) due to low H<sub>2</sub>S solubility in S -high H<sub>2</sub>S pressure needed to dissolve H<sub>2</sub>S in S (from 160-360°C[45]- cfr recent results by [28])</p>   | Organics- H <sub>2</sub> S <sub>x</sub> - ammonia                                                                 | <p>a) <math>\mu</math> = 65-70 Pa·s (rising T);</p> <p>b): <u>NO VISCOUS STAGE</u> (<math>\mu</math> =0.09 Pa·s ( cf. 93.2 Pa·s pure S) for a “slow” T raise)</p> <p>c) <math>\mu</math> =10-14 Pa·s after T heating/cooling cycles</p> <p>d) <math>\mu</math>=0.11 Pa·s (*at 260°C) to <math>\mu</math>=0.03 Pa·s (*at 260°C)</p> <p>e) the longer kept above T interval – the higher <math>\mu</math> on cooling</p> <p>f) Low <math>\mu</math> can be</p> |

|                                                                                                                                                                                                                                                                                                                        |                                                    |                                                                   |                                                                                                                                 |                                                                                                                                                                                                                                 |                                                                                                                          |
|------------------------------------------------------------------------------------------------------------------------------------------------------------------------------------------------------------------------------------------------------------------------------------------------------------------------|----------------------------------------------------|-------------------------------------------------------------------|---------------------------------------------------------------------------------------------------------------------------------|---------------------------------------------------------------------------------------------------------------------------------------------------------------------------------------------------------------------------------|--------------------------------------------------------------------------------------------------------------------------|
|                                                                                                                                                                                                                                                                                                                        |                                                    |                                                                   |                                                                                                                                 |                                                                                                                                                                                                                                 | maintained for indefinite time [44-45]                                                                                   |
| <b>H<sub>2</sub>S<sub>x</sub> (H<sub>2</sub>S<sub>2</sub> to H<sub>2</sub>S<sub>10</sub>)</b>                                                                                                                                                                                                                          | a) 75 °C<br>b) 100 °C<br>c) 125-170°C<br>d)>180 °C | 5wt%                                                              | a) <b>H<sub>2</sub>S<sub>2</sub> boils</b> with decomposition;<br>b) some <b>H<sub>2</sub>S<sub>x</sub> rapid decomposition</b> | H <sub>2</sub> S <sub>x</sub> stability increases by S, H <sub>2</sub> S and organics;<br>H <sub>2</sub> S liberation (H <sub>2</sub> S <sub>x</sub> dissolve in S at 120°C)<br>c) <b>H<sub>2</sub>S bubbling with rising T</b> | c-d) μ=0 Pa·s<br><br>μ < 0.4 Pa·s (at 260 °C) after cooling (kept at 132°C *14 hrs)                                      |
| <b>H<sub>2</sub>SO<sub>4</sub></b><br>(byproduct of SO <sub>2</sub> disproportionation; amounts depending on<br>T> 300°C, 4SO <sub>2</sub> +4H <sub>2</sub> O= H <sub>2</sub> S+3H <sub>2</sub> SO <sub>4</sub> ;<br>T>300°C=3SO <sub>2(aq)</sub> +2H <sub>2</sub> O=S <sup>0</sup> +2H <sub>2</sub> SO <sub>4</sub> ) | A) 125 to 160°C                                    | 0.038-0.05 wt%                                                    | -----                                                                                                                           | -----                                                                                                                                                                                                                           | No value provided                                                                                                        |
| <b>Chlorine</b><br><br><b>OPEN -CLOSED System</b>                                                                                                                                                                                                                                                                      | >180 °C<br>(measurements up to >400 °C)            | OPEN<br>a)1.8 % as SCl <sub>2</sub><br>b) 5 % as SCl <sub>2</sub> | SCl <sub>2</sub>                                                                                                                | Elemental S                                                                                                                                                                                                                     | Viscosity measured at T=200°C maintaining T=190-200°C (at 0.22 mm Hg [44-45]*)<br>A) μ= 0.3 Pa·s (at<br>B) μ= 0.015 Pa·s |
| <b>Fluorine</b>                                                                                                                                                                                                                                                                                                        | -----<br>[44-45]                                   | -----                                                             | -----                                                                                                                           | No data provided, only a phrase “ ...decreasing effectiveness in decreasing viscosity Chlorine, bromine and iodine. Fluorine would probably head the group [44]                                                                 | -----                                                                                                                    |
|                                                                                                                                                                                                                                                                                                                        |                                                    | OPEN                                                              |                                                                                                                                 |                                                                                                                                                                                                                                 | a) μ= *0.08 Pa·s                                                                                                         |

|                                                  |                                                          |                                                                                                                                 |                                                                                                             |  |                                                                                                                                                               |
|--------------------------------------------------|----------------------------------------------------------|---------------------------------------------------------------------------------------------------------------------------------|-------------------------------------------------------------------------------------------------------------|--|---------------------------------------------------------------------------------------------------------------------------------------------------------------|
| <b>Bromine</b><br><br><b>OPEN -CLOSED System</b> | >180 °C<br>(measurements<br>up to >400 °C)               | a) 1% as Br <sub>2</sub><br>b) 8% as Br <sub>2</sub><br><br>CLOSED<br>c) 2% as Br <sub>2</sub>                                  |                                                                                                             |  | (at 280 °C)<br>b) $\mu$ = *0.005Pa·s<br>(at 280 °C)<br>c) $\mu$ = *0.005Pa·s<br>(at 300 °C)                                                                   |
| <b>Iodine</b><br><br><b>OPEN -CLOSED System</b>  | > 180 °C<br>(measurements<br>up to >400 °C)              | OPEN<br>a) 3 %as I <sub>2</sub><br>b) 10% as I <sub>2</sub><br><br>CLOSED<br>c) 3% as I <sub>2</sub><br>d) 6% as I <sub>2</sub> |                                                                                                             |  | a)* $\mu$ = 0.08 Pa·s<br>(at 280°C)<br>b) * $\mu$ = 0.03 Pa·s<br>(at 240 °C)<br>c) * $\mu$ = 0.03 Pa·s<br>(at 280 °C)<br>d) * $\mu$ = 0.04 Pa·s<br>(at 240°C) |
| <b>Ammonia</b>                                   | A) 140°C<br>(23 to 600 hrs)<br><br>B) 190 °C<br>(40 hrs) | Gas fluxed<br>through S<br>( no amounts<br>given)                                                                               | Formation of H <sub>2</sub> S <sub>x</sub> and H <sub>2</sub> S<br><b>(ammonia +S)</b><br><br>Slow reaction |  | A) slow reaction<br>$\mu$ =74-76 Pa·s)<br><br>B) 60 Pa·s                                                                                                      |

Table S1. Schematic effects of different components on sulfur-viscosity at different temperatures, with respect to pure sulfur (maximum  $\mu$  =93.2 Pa·s at 186-188°C-) according to experimental industrial studies in the '40s [43,44,45]. Data refers to components mixed /fluxed with(in) the pure substance. ( \*) refers to maximum values measured. Common products and interactions between components are shown.
