# Supplementary material
Source: MDPI journal article supplement (https://www.mdpi.com/2076-3263/14/4/97)
Supplement: s1 [file s1]

Archive with 2 entries (2 files):
- supplementary -TABLE S1 - .pdf
- supplementary 2 .pdf
